# Supplementary material
Source: Research Square preprint supplement (doi:10.21203/rs.3.rs-9824400/v1)
Supplement: Supplementary file 2 [file f335fcd6f8e0826a074e76ee.xlsx]

## Sheet: CG_7P_Ref
initial_piece	destination_piece	level	artefact	raw_material	raw_material_cat	category	tech_type	blank_type	retouch_type	length	width	thickness	weight	x	y	z	n_ref	ref_class	module	origin	destination	x_inclination	y_inclination	incxmo	incymo	horizontal_dist	azimuth	axis	inclination	vertical_dist
482	483	7p	lit	sil	nc	bpf	s.def	s.def		24	12	5	160	238033	528345	2996589	1	4
483	482	7p	lit	sil	nc	bpf	s.def	s.def		17	14	5	150	238096	528376	2996603	1	4		483	482	-63	-31	63	31	7	244	64	-11	-14
1358	1359	7p	lit	sil	a--201	bpf	s.def	s.def		30	20	3	190	235641	526466	2996624	2	4
1359	1358	7p	lit	sil	a--201	bpf	s.def	s.def		20	16	3	70	235642	526394	2996617	2	4		1359	1358	-1	72	1	72	72	359	179	6	7
2692	2691	7p	lit	sil	m--nc	bpf	s.def	s.def		42	41	9	1150	235411	526558	2996782	3	2
2691	2692	7p	lit	sil	m--nc	bpf	s.def	s.def		42	26	9	700	235305	526455	2996783	3	2		2691	2692	16	13	16	13	148	46	46	0	-1
1128	1204	7p	lit	sil	nc	bpf	semi-cresta	lp		19	10	5	120	235726	526451	2996600	4	4
1204	1128	7p	lit	sil	nc	bpf	semi-cresta	lm		24	9	5	110	235715	526410	2996626	4	4		124	1128	11	41	11	41	42	15	15	-31	-26
1356	1129	7p	lit	sil	nc	bpf	s.def	lp		23	18	7	280	235671	526591	2996606	5	2
1129	1356	7p	lit	sil	nc	bpf	s.def	lp		28	19	4	230	235773	526475	2996629	5	2		1129	1356	-12	116	12	116	154	319	139	-8	-23
1129	1133	7p	lit	sil	nc	bpf	s.def	lp		28	19	4	230	235773	526475	2996629	5	4
1133	1129	7p	lit	sil	nc	bn2g	s.def	ld	g11	23	20	5	260	235871	526515	2996612	5	4		1133	1129	-98	-4	98	4	16	248	68	9	17
1356	1263	7p	lit	sil	nc	bpf	s.def	lp		23	18	7	280	235671	526591	2996606	5	2
1263	1356	7p	lit	sil	nc	bn2g	s.def	ld	d3	23	18	4	160	235845	526607	2996605	5	4		1263	1356	-174	-16	174	16	175	265	85	0	1
1532	1402	7p	lit	sil	sll--1	bpf	s.def	lm		25	23	7	450	235916	526469	2996587	6	4
1402	1532	7p	lit	sil	sll--1	bpf	s.def	s.def		33	24	9	690	235720	526481	2996591	6	4		142	1532	196	-12	196	12	196	94	94	-1	-4
1532	1585	7p	lit	sil	sll--1	bpf	s.def	lm		25	23	7	450	235916	526469	2996587	6	4
1585	1532	7p	lit	sil	sll--1	bpf	s.def	ld		28	19	5	250	235908	526447	2996586	6	4		1585	1532	8	22	8	22	23	2	2	2	1
2338	2339	7p	lit	sil	g--210	bp	s.def	lasca		52	32	14	2040	235105	525750	2996635	7	2	Lasca
2339	2338	7p	lit	sil	g--210	bp	s.def	lasca		12	30	3	140	235213	525717	2996648	7	2	Lasca	2339	2338	-18	33	18	33	113	287	17	-7	-13
1026	1029	7p	lit	cz	nc	bpi	s.def	s.def		42	36	21	3460	235367	526493	2996651	8	8
1029	1026	7p	lit	cz	nc	bpi	s.def	s.def		55	26	19	3210	235477	526592	2996659	8	8		129	126	-11	-99	11	99	148	228	48	-3	-8
1958	933	7p	lit	sil	a--216	bpf	s.def	s.def		28	13	7	230	235114	526019	2996660	9	2
933	1958	7p	lit	sil	a--216	bpf	s.def	ld		20	12	3	50	235248	526577	2996674	9	2		933	1958	-134	-558	134	558	574	194	14	-1	-14
1958	1713	7p	lit	sil	a--216	bpf	s.def	s.def		28	13	7	230	235114	526019	2996660	9	2
1713	1958	7p	lit	sil	a--216	bpf	s.def	s.def		27	16	7	220	235378	525889	2996690	9	2		1713	1958	-264	13	264	13	294	296	116	-6	-3
2124	1435	7p	lit	sil	nc	bn1g	s.def	s.def		30	23	26	1300	235003	525982	2996638	10	1
1435	2124	7p	lit	sil	nc	bp	s.def	laminar		23	4	2	20	235731	526614	2996592	10	1	Laminita	1435	2124	-728	-632	728	632	964	229	49	3	46
2494	2801	7p	lit	sil	a--201	bn1g	s.def	s.def	b23	30	25	5	490	235691	527073	2996665	11	1
2801	2494	7p	lit	sil	nc	bp	cburil 1	bp(l)		23	11	4	70	235204	525666	2996639	11	1	Laminita	281	2494	487	147	487	147	1489	19	19	1	26
939	1290	7p	lit	sil	sll--3	bpf	gburil	ld		23	4	3	30	235172	526463	2996642	12	4
1290	939	7p	lit	sil	sll--3	bpf	gburil	lm		10	5	2	10	235436	526474	2996632	12	4		129	939	-264	-11	264	11	264	268	88	2	1
1216	1303	7p	lit	sil	a--001	bpf	cburil 1	ld		20	4	3	20	235133	526308	2996638	13	4
1303	1216	7p	lit	sil	a--001	bpf	cburil 1	lm		20	4	4	40	235740	526358	2996630	13	4		133	1216	-67	-5	67	5	69	265	85	1	8
1839	4430	7p	lit	sil	sll--4	bpf	cburil 2	lm		13	5	3	20	234846	526003	2996688	14	4
4430	1839	7p	lit	sil	s.def	bpf	cburil 1	ld		9	4	2	10	234715	526302	2996692	14	4		443	1839	131	-299	131	299	326	156	156	-1	-4
1782	1816	7p	lit	sil	a--216	bpf	s.def	s.def		22	22	4	200	234883	525793	2996707	15	4
1816	1782	7p	lit	sil	a--216	bpf	s.def	s.def		17	12	2	30	234754	526027	2996708	15	4		1816	1782	129	-234	129	234	267	151	151	0	-1
3257	3258	7p	lit	sil	m--nc	bpi	s.def	s.def		52	28	20	2190	235060	526536	2996683	16	3
3258	3257	7p	lit	sil	m--nc	bpi	s.def	s.def		24	17	11	390	235065	526535	2996673	16	3		3258	3257	-5	1	5	1	5	281	11	63	1
3257	3259	7p	lit	sil	m--nc	bpi	s.def	s.def		52	28	20	2190	235060	526536	2996683	16	3
3259	3257	7p	lit	sil	m--nc	bpi	s.def	s.def		24	22	11	390	235074	526506	2996678	16	3		3259	3257	-14	3	14	3	33	335	155	9	5
143	130	7p	lit	sil	m--nc	bpf	s.def	s.def		27	17	8	310	237679	527988	2996625	17	4
130	143	7p	lit	sil	m--nc	bpf	s.def	s.def		22	21	3	150	238333	527575	2996641	17	4		13	143	-654	413	654	413	773	32	122	-1	-16
2264	2839	7p	lit	sil	nc	bpf	s.def	s.def		24	21	3	200	235196	526152	2996640	18	4
2839	2264	7p	lit	sil	nc	bpf	s.def	ld		17	16	3	80	235453	526211	2996670	18	4		2839	2264	-257	-59	257	59	264	257	77	-6	-3
296	314	7p	lit	sil	m--nc	bp	s.def	lasca		31	28	8	570	237712	527560	2996562	19	2	Lasca
314	296	7p	lit	sil	m--nc	bp	s.def	lasca		25	18	7	230	237885	527820	2996577	19	2	Lasca	314	296	-173	-26	173	26	312	214	34	-3	-15
296	362	7p	lit	sil	m--nc	bp	s.def	lasca		31	28	8	570	237712	527560	2996562	19	2	Lasca
362	296	7p	lit	sil	m--nc	bp	s.def	lasca		20	14	4	70	237671	527416	2996544	19	2	Lasca	362	296	41	144	41	144	15	16	16	7	18
2020	897	7p	lit	sil	m--220	bp	s.def	lasca		42	33	5	880	234717	526043	2996671	20	0	Lasca
897	2020	7p	lit	sil	m--220	bp	s.def	laminar		33	15	3	130	235558	526576	2996647	20	0	Lasca laminar	897	22	-841	-533	841	533	996	238	58	1	24
2020	1911	7p	lit	sil	m--220	bp	s.def	lasca		42	33	5	880	234717	526043	2996671	20	0	Lasca
1911	2020	7p	lit	sil	m--220	bp	s.def	laminar		50	21	5	500	234466	526222	2996742	20	2	Lámina	1911	22	251	-179	251	179	38	125	125	-13	-71
1765	2026	7p	lit	sil	m--220	bpf	s.def	s.def		26	19	3	220	235138	525996	2996661	21	3
2026	1765	7p	lit	sil	m--220	bpf	s.def	s.def		26	16	3	150	235258	525900	2996673	21	3		226	1765	-12	96	12	96	154	39	129	-4	-12
915	2798	7p	lit	sil	m--220	bpf	s.def	s.def		38	22	6	450	235266	526513	2996674	22	4
2798	915	7p	lit	sil	m--220	bpf	s.def	s.def		21	19	4	120	235109	526336	2996665	22	4		2798	915	157	177	157	177	237	42	42	2	9
2244	2186	7p	lit	sil	g--206	bpf	s.def	s.def		31	22	3	270	235395	526011	2996661	23	4
2186	2244	7p	lit	sil	g--206	bpf	s.def	s.def		21	16	4	190	235226	525969	2996637	23	4		2186	2244	169	42	169	42	174	76	76	8	24
3071	3072	7p	ose	os det	s.def	s.def	s.def	s.def		0	0	0	0	238720	528510	2996588	24	10
3072	3071	7p	ose	os det	s.def	s.def	s.def	s.def		0	0	0	0	238710	528481	2996584	24	10		372	371	1	29	1	29	31	19	19	7	4
2461	3572	7p	ose	os det	s.def	s.def	s.def	s.def		0	0	0	0	235492	526955	2996774	25	11
3572	2461	7p	ose	os det	s.def	s.def	s.def	s.def		0	0	0	0	235497	526949	2996779	25	11		3572	2461	-5	6	5	6	8	32	14	-33	-5
2461	3573	7p	ose	os det	s.def	s.def	s.def	s.def		0	0	0	0	235492	526955	2996774	25	11
3573	2461	7p	ose	os det	s.def	s.def	s.def	s.def		0	0	0	0	235478	526961	2996776	25	11		3573	2461	14	-6	14	6	15	113	113	-7	-2
352	3050	7p	ose	os det	s.def	s.def	s.def	s.def		0	0	0	0	238979	528385	2996520	26	10
3050	352	7p	ose	os det	s.def	s.def	s.def	s.def		0	0	0	0	238855	528376	2996605	26	10		35	352	124	9	124	9	124	86	86	-34	-85
1945	3574	7p	ose	os det	s.def	s.def	s.def	s.def		0	0	0	0	235292	525999	2996684	27	10
3574	1945	7p	ose	os det	s.def	s.def	s.def	s.def		0	0	0	0	235291	526013	2996697	27	10		3574	1945	1	-14	1	14	14	176	176	-43	-13
2259	3575	7p	ose	os det	s.def	s.def	s.def	s.def		0	0	0	0	235131	526111	2996626	28	10
3575	2259	7p	ose	os det	s.def	bp	s.def	s.def		0	0	0	0	235113	526131	2996635	28	10		3575	2259	18	-2	18	2	27	138	138	-18	-9
3396	2541	7p	ose	os det	s.def	s.def	s.def	s.def		0	0	0	0	235577	527852	2996631	29	10
2541	3396	7p	ose	os det	s.def	s.def	s.def	s.def		0	0	0	0	235765	527384	2996612	29	10		2541	3396	-188	468	188	468	54	338	158	2	19
3561	3576	7p	ose	os det	s.def	s.def	s.def	s.def		0	0	0	0	235157	527147	2996485	30	11
3576	3561	7p	ose	os det	s.def	s.def	s.def	s.def		0	0	0	0	235178	527161	2996486	30	11		3576	3561	-21	-14	21	14	25	236	56	-2	-1
2573	2614	7p	ose	os det	s.def	s.def	s.def	s.def		0	0	0	0	235741	527179	2996600	31	10
2614	2573	7p	ose	os det	s.def	s.def	s.def	s.def		0	0	0	0	235764	527532	2996601	31	10		2614	2573	-23	-353	23	353	354	184	4	0	-1
2512	2543	7p	ose	os det	s.def	s.def	s.def	s.def		0	0	0	0	235857	527379	2996643	32	10
2543	2512	7p	ose	os det	s.def	s.def	s.def	s.def		0	0	0	0	235811	527371	2996625	32	10		2543	2512	46	8	46	8	47	8	8	21	18
1794	3532	7p	ose	os det	s.def	s.def	s.def	s.def		0	0	0	0	235263	525828	2996688	33	11
3532	1794	7p	ose	os det	s.def	s.def	s.def	s.def		0	0	0	0	236806	527863	2996592	33	11		3532	1794	-1543	-235	1543	235	2554	217	37	2	96
3454	3426	7p	ose	os det	s.def	s.def	s.def	s.def		0	0	0	0	235696	527692	2996589	34	11
3426	3454	7p	ose	os det	s.def	s.def	s.def	s.def		0	0	0	0	235497	527898	2996626	34	11		3426	3454	199	-26	199	26	286	136	136	-7	-37
2781	3577	7p	ose	os det	s.def	s.def	s.def	s.def		0	0	0	0	235290	526323	2996665	35	10
3577	2781	7p	ose	os det	s.def	s.def	s.def	s.def		0	0	0	0	235294	526336	2996683	35	10		3577	2781	-4	-13	4	13	14	197	17	-53	-18
3781	3821	7p	lit	sil	a--201	bp	s.def	laminar		42	12	5	230	238889	528929	2996577	36	2	Lasca laminar
3821	3781	7p	lit	sil	a--201	bp	s.def	laminar		40	8	3	100	238780	528995	2996558	36	2	Laminita	3821	3781	19	-66	19	66	127	121	121	8	19
3785	3782	7p	lit	sil	a--201	bp	s.def	laminar		30	8	4	90	238762	529103	2996585	37	2	Laminita
3782	3785	7p	lit	sil	a--201	bp	s.def	laminar		28	9	4	100	238867	529028	2996580	37	2	Laminita	3782	3785	-15	75	15	75	129	36	126	2	5
1096	2036	7p	lit	sil	nc	bpf	s.def	lp		26	11	5	110	235300	526266	2996673	38	2
2036	1096	7p	lit	sil	nc	bpf	s.def	lp		22	8	2	60	235007	525913	2996672	38	2		236	196	293	353	293	353	459	4	4	0	1
310	3002	7p	lit	sil	nc	bp	s.def	lasca		25	16	9	360	237923	527616	2996566	39	2	Lasca
3002	310	7p	lit	sil	nc	bn1g	s.def	s.def		29	24	6	360	238801	528320	2996555	39	2		32	31	-878	-74	878	74	1125	231	51	1	11
2762	2057	7p	lit	ca	nc	bn2g	s.def	bpf	pru	32	24	4	510	235304	526348	2996681	40	3	Lasca
2057	2762	7p	lit	ca	nc	bpf	s.def	s.def		22	17	3	160	235322	525845	2996681	40	3		257	2762	-18	53	18	53	53	358	178	0	0
1983	2423	7p	lit	sil	m--nc	bp	gburil	laminar		34	9	7	100	235154	525924	2996665	41	2	Laminita
2423	1983	7p	lit	sil	m--220	bp	s.def	laminar		15	8	2	30	235735	527021	2996767	41	2	Lasca	2423	1983	-581	-197	581	197	1241	28	28	-5	-12
2396	2048	7p	lit	sil	sll--1	bn2g	s.def	bp	g12	32	20	7	580	235025	525816	2996586	42	13	Lasca
2048	2396	7p	lit	sil	sll--4	bn2g	gburil	lp	ld21	25	4	3	50	234567	525664	2996680	42	13		248	2396	458	152	458	152	483	72	72	-11	-94
1697	1524	7p	lit	sil	a--201	bn1g	s.def	s.def	b32	43	33	7	1030	234722	525948	2996712	43	1
1524	1697	7p	lit	sil	a--201	bpf	cburil 2	ld		21	6	7	80	235851	526365	2996605	43	1		1524	1697	-1129	-417	1129	417	124	25	7	5	17
1697	2588	7p	lit	sil	a--201	bn1g	s.def	s.def	b32	43	33	7	1030	234722	525948	2996712	43	1
2588	1697	7p	lit	sil	a--201	bpf	tb	ld		19	7	4	60	235575	527069	2996612	43	1		2588	1697	-853	-1121	853	1121	149	217	37	4	1
2588	1524	7p	lit	sil	a--201	bpf	tb	ld		19	7	4	60	235575	527069	2996612	43	2
1524	2588	7p	lit	sil	a--201	bpf	cburil 2	ld		21	6	7	80	235851	526365	2996605	43	2		1524	2588	-276	74	276	74	756	339	159	1	7
1408	2588	7p	lit	sil	a--201	bpf	gburil	lp		15	6	3	30	235775	526751	2996610	43	2
2588	1408	7p	lit	sil	a--201	bpf	tb	ld		19	7	4	60	235575	527069	2996612	43	2		2588	148	2	-318	2	318	376	148	148	0	-2
1408	1524	7p	lit	sil	a--201	bpf	gburil	lp		15	6	3	30	235775	526751	2996610	43	2
1524	1408	7p	lit	sil	a--201	bpf	cburil 2	ld		21	6	7	80	235851	526365	2996605	43	4		1524	148	-76	386	76	386	393	349	169	1	5
894	964	7p	lit	sil	sll--3	bn1g	s.def	s.def		32	17	13	740	235594	526431	2996643	44	1
964	894	7p	lit	sil	sll--3	bp	s.def	laminar		41	8	5	150	235327	526405	2996654	44	1	Laminita	964	894	267	26	267	26	268	84	84	-2	-11
2422	1484	7p	lit	sil	sll--4	bpf	s.def	ld		26	8	3	70	235656	527010	2996717	45	4
1484	2422	7p	lit	sil	sll--4	bpf	s.def	lp		17	8	2	40	235796	526546	2996588	45	4		1484	2422	-14	464	14	464	485	343	163	15	129
850	1213	7p	lit	sil	sll--4	bpf	s.def	ld		17	8	3	30	235524	526330	2996659	46	4
1213	850	7p	lit	sil	sll--4	bpf	s.def	lp		19	9	3	60	235149	526423	2996630	46	4		1213	85	375	-93	375	93	386	14	14	4	29
2452	1411	7p	lit	sil	sll--4	bpf	s.def	lm		22	11	2	60	235588	526833	2996639	47	4
1411	2452	7p	lit	sil	sll--4	bpf	s.def	ld		15	8	2	20	235922	526628	2996584	47	4		1411	2452	-334	25	334	25	392	32	122	8	55
2589	2427	7p	lit	sil	sll--3	bpf	s.def	ld		12	8	1	10	235799	527225	2996585	48	4
2427	2589	7p	lit	sil	sll--4	bpf	s.def	lm		12	6	1	10	235863	527048	2996793	48	4		2427	2589	-64	177	64	177	188	34	16	-48	-28
2809	2370	7p	lit	sil	a--201	bn1g	s.def	s.def		21	8	4	60	235640	526524	2996664	49	1
2370	2809	7p	lit	sil	nc	bn1g	s.def	s.def	b12	47	23	12	2040	235203	526854	2996712	49	1		237	289	437	-33	437	33	548	127	127	-5	-48
1734	1053	7p	lit	sil	nc	bpf	s.def	ld		42	12	6	250	234979	525783	2996702	49	2
1053	1734	7p	lit	sil	nc	bpf	s.def	s.def		38	24	8	580	235212	526354	2996637	49	2		153	1734	-233	-571	233	571	617	22	22	6	65
1734	2370	7p	lit	sil	nc	bpf	s.def	ld		42	12	6	250	234979	525783	2996702	49	2
2370	1734	7p	lit	sil	nc	bn1g	s.def	s.def	b12	47	23	12	2040	235203	526854	2996712	49	2		237	1734	-224	-171	224	171	194	192	12	-1	-1
858	1149	7p	lit	sil	a--201	bpf	gburil	ld		36	7	3	70	235320	526220	2996656	50	1
1149	858	7p	lit	sil	sll--3	bn1g	s.def	s.def	b31a	36	26	9	910	235077	526504	2996636	50	1		1149	858	243	-284	243	284	374	139	139	3	2
2143	1149	7p	lit	sil	a--201	bpf	gburil	ld		16	4	2	20	234903	526099	2996642	50	1
1149	2143	7p	lit	sil	sll--3	bn1g	s.def	s.def	b31a	36	26	9	910	235077	526504	2996636	50	1		1149	2143	-174	-45	174	45	441	23	23	1	6
858	2143	7p	lit	sil	a--201	bpf	gburil	ld		36	7	3	70	235320	526220	2996656	50	1
2143	858	7p	lit	sil	a--201	bpf	gburil	ld		16	4	2	20	234903	526099	2996642	50	2		2143	858	417	121	417	121	434	74	74	2	14
858	4367	7p	lit	sil	a--201	bpf	gburil	ld		36	7	3	70	235320	526220	2996656	50	1
4367	858	7p	lit	sil	s.def	bpf	cburil 2	ld		13	2	2	20	234863	525797	2996734	50	2		4367	858	457	423	457	423	623	47	47	-7	-78
1914	934	7p	lit	sil	nc	bpf	s.def	lp		21	7	4	80	235116	525833	2996675	51	2
934	1914	7p	lit	sil	g--nc	bp	s.def	laminar		25	8	3	60	235292	526588	2996669	51	2	Laminita	934	1914	-176	-755	176	755	775	193	13	0	6
934	1298	7p	lit	sil	g--nc	bp	s.def	laminar		25	8	3	60	235292	526588	2996669	51	2	Laminita
1298	934	7p	lit	sil	nc--c	bp	s.def	laminar		27	9	2	70	235561	526430	2996620	51	2	Laminita	1298	934	-269	158	269	158	312	3	12	9	49
1914	1852	7p	lit	sil	nc	bpf	s.def	lp		21	7	4	80	235116	525833	2996675	51	2
1852	1914	7p	lit	sil	nc	bpf	s.def	lp		23	5	2	40	235207	525766	2996686	51	2		1852	1914	-91	67	91	67	113	36	126	-6	-11
2859	1002	7p	lit	sil	a--201	bpf	s.def	lp		10	9	3	40	235813	526800	2996656	52	4
1002	2859	7p	lit	sil	a--201	bpf	s.def	lm		10	10	2	30	235399	526154	2996665	52	4		12	2859	414	646	414	646	767	33	33	-1	-9
884	1008	7p	lit	sil	g--207	bn2g	s.def	bpf		39	27	5	470	235448	526153	2996667	53	4	Lasca
1008	884	7p	lit	sil	g--207	bpf	s.def	s.def	r1	30	18	5	360	235091	526525	2996652	53	4		18	884	357	-372	357	372	516	136	136	2	15
1403	1400	7p	lit	sil	g--207	bpf	s.def	s.def		32	26	9	640	235781	526546	2996598	54	4
1400	1403	7p	lit	sil	g--207	bpf	s.def	s.def		35	27	13	670	235666	526427	2996617	54	4		14	143	115	119	115	119	165	44	44	-7	-19
1683	1885	7p	lit	sil	g--207	bpf	s.def	s.def		31	31	7	640	234655	525541	2996778	55	2
1885	1683	7p	lit	sil	g--207	bpf	s.def	s.def		21	18	2	100	234922	525538	2996722	55	2		1885	1683	-267	3	267	3	267	271	91	12	56
2096	1939	7p	lit	sil	a--201	bpf	s.def	ld		38	14	4	190	235158	526018	2996655	56	4
1939	2096	7p	lit	sil	a--201	bpf	s.def	lp		15	9	3	40	234955	526090	2996656	56	4		1939	296	23	-72	23	72	215	11	11	0	-1
1220	3320	7p	lit	sil	a--201	bpf	s.def	ld		26	11	3	80	235391	526372	2996637	57	4
3320	1220	7p	lit	sil	a--201	bpf	s.def	lp		15	12	4	60	235608	526023	2996582	57	4		332	122	-217	349	217	349	411	328	148	8	55
2779	966	7p	lit	sil	a--201	bpf	s.def	lp		41	14	4	260	235183	526539	2996682	58	4
966	2779	7p	lit	sil	a--201	bpf	s.def	ld		13	5	3	20	235303	526466	2996668	58	4		966	2779	-12	73	12	73	14	31	121	6	14
1341	1726	7p	lit	sil	a--201	bpf	s.def	ld		28	15	5	2300	235276	526409	2996614	59	2
1726	1341	7p	lit	sil	nc	bpf	s.def	s.def		32	13	12	550	234767	525574	2996751	59	2		1726	1341	59	835	59	835	978	31	31	-8	-137
1341	1767	7p	lit	sil	a--201	bpf	s.def	ld		28	15	5	2300	235276	526409	2996614	59	2
1767	1341	7p	lit	sil	a--201	bpf	s.def	ld		28	12	5	150	235005	525767	2996688	59	4		1767	1341	271	642	271	642	697	23	23	-6	-74
3141	633	7p	lit	sil	a--201	bpf	s.def	lp		25	14	4	170	239134	528722	2996592	60	4
633	3141	7p	lit	sil	a--201	bpf	s.def	ld		9	10	3	30	238370	528757	2996586	60	4		633	3141	764	-35	764	35	765	93	93	0	6
2739	2738	7p	lit	sil	a--201	bpf	s.def	ld		23	15	3	900	235248	526616	2996715	61	4
2738	2739	7p	lit	sil	a--201	bpf	s.def	lp		17	14	4	90	235292	526669	2996706	61	4		2738	2739	-44	-53	44	53	69	22	4	7	9
1282	3249	7p	lit	sil	nc	bpf	s.def	ld		25	10	3	80	235222	526409	2996620	62	4
3249	1282	7p	lit	sil	nc	bpf	s.def	lp		11	8	2	18	235038	525838	2996666	62	4		3249	1282	184	571	184	571	6	18	18	-4	-46
1601	1619	7p	lit	sil	nc	bpf	s.def	lp		19	14	4	170	235784	526567	2996576	63	4
1619	1601	7p	lit	sil	nc	bpf	s.def	ld		17	14	4	110	235819	526568	2996578	63	4		1619	161	-35	-1	35	1	35	268	88	-3	-2
2437	1853	7p	lit	sil	g--211	bp	s.def	laminar		52	15	4	270	235659	526852	2996675	64	2	Lámina
1853	2437	7p	lit	sil	g--211	bp	s.def	laminar		17	6	2	30	235252	525832	2996687	64	2	Laminita	1853	2437	47	12	47	12	198	22	22	-1	-12
2437	1871	7p	lit	sil	g--211	bp	s.def	laminar		52	15	4	270	235659	526852	2996675	64	2	Lámina
1871	2437	7p	lit	sil	g--211	bpf	gburil	ld		34	6	2	50	235307	526028	2996692	64	2		1871	2437	352	824	352	824	896	23	23	-1	-17
2127	3252	7p	lit	sil	g--nc	bp	s.def	laminar		47	11	5	220	235106	525861	2996652	65	2	Laminita
3252	2127	7p	lit	sil	nc	bp	s.def	laminar		14	5	2	9	235035	525839	2996662	65	2	Laminita	3252	2127	71	22	71	22	74	73	73	-8	-1
2102	1522	7p	lit	sil	sll--3	bpf	semi-tableta	lasca		22	12	3	80	235290	526018	2996656	66	2
1522	2102	7p	lit	sil	sll--3	bpf	semi-tableta	lasca		30	17	5	150	235682	526343	2996627	66	2		1522	212	-392	-325	392	325	59	23	5	3	29
1452	2050	7p	lit	sil	a--201	bpf	s.def	s.def		29	17	4	200	235041	526159	2996656	67	2
2050	1452	7p	lit	sil	a--201	bpf	s.def	s.def		15	14	2	50	235104	525819	2996676	67	2		25	1452	-63	34	63	34	346	35	17	-3	-2
1452	1737	7p	lit	sil	a--201	bpf	s.def	s.def		29	17	4	200	235041	526159	2996656	67	2
1737	1452	7p	lit	sil	a--201	bpf	s.def	s.def		30	21	5	490	235168	525805	2996697	67	4		1737	1452	-127	354	127	354	376	34	16	-6	-41
882	1748	7p	lit	sil	a--201	bpf	s.def	lp		39	29	10	1230	234972	526565	2996684	68	4
1748	882	7p	lit	sil	a--201	bpf	s.def	ld		32	21	12	1100	234958	525419	2996757	68	4		1748	882	14	1146	14	1146	1146	1	1	-4	-73
832	21	7p	lit	sil	nc	bpf	s.def	s.def		53	30	15	1720	239708	528209	2996643	69	2
21	832	7p	lit	sil	nc	bpf	s.def	s.def		26	11	7	180	238646	527941	2996674	69	2		21	832	162	268	162	268	195	76	76	-2	-31
864	1678	7p	lit	sil	sll--3	bp	s.def	lasca		14	17	3	60	235395	526606	2996676	70	2	Lasca
1678	864	7p	lit	sil	sll--3	bp	s.def	lasca		27	18	7	240	234498	525343	2996851	70	2	Lasca	1678	864	897	1263	897	1263	1549	35	35	-6	-175
1720	1669	7p	lit	sil	nc	bp	s.def	lasca		17	26	6	200	234521	526119	2996731	71	2	Lasca
1669	1720	7p	lit	sil	nc	bp	s.def	lasca		24	32	12	940	235171	525955	2996711	71	2	Lasca	1669	172	-65	164	65	164	67	284	14	2	2
3238	1669	7p	lit	sil	a--201	bp	s.def	lasca		37	35	8	690	235311	526346	2996654	71	2	Lasca
1669	3238	7p	lit	sil	nc	bp	s.def	lasca		24	32	12	940	235171	525955	2996711	71	2	Lasca	1669	3238	14	391	14	391	415	2	2	-8	-57
1720	1749	7p	lit	sil	nc	bp	s.def	lasca		17	26	6	200	234521	526119	2996731	71	2	Lasca
1749	1720	7p	lit	sil	a--nc	bp	s.def	lasca		21	30	6	330	234967	525536	2996731	71	2	Lasca	1749	172	-446	583	446	583	734	323	143	0	0
3238	1749	7p	lit	sil	a--201	bp	s.def	lasca		37	35	8	690	235311	526346	2996654	71	2	Lasca
1749	3238	7p	lit	sil	a--nc	bp	s.def	lasca		21	30	6	330	234967	525536	2996731	71	2	Lasca	1749	3238	344	81	344	81	88	23	23	-5	-77
1720	3238	7p	lit	sil	nc	bp	s.def	lasca		17	26	6	200	234521	526119	2996731	71	2	Lasca
3238	1720	7p	lit	sil	a--201	bp	s.def	lasca		37	35	8	690	235311	526346	2996654	71	2	Lasca	3238	172	-79	-227	79	227	822	254	74	5	77
3604	3682	7p	lit	sil	nc	bp	s.def	lasca		24	17	3	140	239183	529090	2996641	72	2	Lasca
3682	3604	7p	lit	sil	nc	bp	vn	lasca		28	32	12	960	239368	528984	2996623	72	2	Lasca	3682	364	-185	16	185	16	213	3	12	5	18
109	49	7p	lit	sil	a--201	bp	s.def	lasca		22	17	2	70	237689	527759	2996627	73	1	Lasca
49	109	7p	lit	sil	a--201	bn1g	s.def	s.def		45	34	25	4220	237829	528161	2996687	73	1		49	19	-14	-42	14	42	426	199	19	-8	-6
1481	1460	7p	lit	sil	sll--3	bn2g	s.def	bpf	ld21	16	5	3	30	235763	526622	2996580	74	4	Laminita
1460	1481	7p	lit	sil	sll--3	bn2g	s.def	lm	ld21	15	4	2	20	235819	526516	2996594	74	4		146	1481	-56	16	56	16	12	332	152	-7	-14
1279	1795	7p	lit	sil	sll--3	bn2g	s.def	lm	ld21	18	3	2	20	235459	526191	2996628	75	4	Flaminita
1795	1279	7p	lit	sil	sll--3	bn2g	s.def	ld	ld21	12	4	2	10	235305	525863	2996683	75	4		1795	1279	154	328	154	328	362	25	25	-9	-55
3248	2086	7p	lit	sil	nc	bn2g	s.def	lm	ld21	9	4	1	6	235032	525850	2996669	76	4	Flaminita
2086	3248	7p	lit	sil	sll--3	bn2g	s.def	lm	ld21	13	3	2	10	235211	526072	2996654	76	4		286	3248	-179	-222	179	222	285	219	39	3	15
2100	1428	7p	lit	sil	sll--3	bn2g	s.def	ld	ld21	17	5	3	20	235043	526148	2996632	77	4	Flaminita
1428	2100	7p	lit	sil	sll--4	bn2g	s.def	ld	ld21	16	4	3	20	235209	526272	2996617	77	4		1428	21	-166	-124	166	124	27	233	53	4	15
1485	2092	7p	lit	sil	a--201	bn2g	s.def	lp	ld21	15	6	2	20	235774	526537	2996599	78	4	Flaminita
2092	1485	7p	lit	sil	a--201	bn2g	s.def	lm	ld21	10	5	2	20	235064	525901	2996658	78	4		292	1485	71	636	71	636	953	48	48	-4	-59
1211	2376	7p	lit	sil	nc	bn1g	s.def	s.def	a11	53	42	15	3200	235963	526701	2996614	79	1
2376	1211	7p	lit	sil	nc	bp	gburil	laminar		26	8	4	60	235418	526750	2996690	79	1	Laminita	2376	1211	545	-49	545	49	547	95	95	-8	-76
1561	1567	7p	lit	sil	a--201	bpf	cburil 1	lp		17	6	3	30	235839	526677	2996567	80	4
1567	1561	7p	lit	sil	a--201	bpf	cburil 1	lp		10	3	1	10	235919	526659	2996563	80	4		1567	1561	-8	18	8	18	82	283	13	3	4
1830	1910	7p	lit	sil	g--211	bn2g	s.def	bp(l)	b22	33	15	5	310	235054	525585	2996728	81	1	Lasca laminar
1910	1830	7p	lit	sil	g--211	bpf	cburil 1	ld		20	5	4	40	234674	526062	2996695	81	1		191	183	38	-477	38	477	61	141	141	3	33
1830	4507	7p	lit	sil	g--211	bn2g	s.def	bp(l)	b22	33	15	5	310	235054	525585	2996728	81	1	Lasca laminar
4507	1830	7p	lit	sil	s.def	bp	gburil	laminar		14	4	3	20	235010	525865	2996677	81	1	Laminita	457	183	44	-28	44	28	283	171	171	1	51
2307	1073	7p	lit	sil	g--nc	bp	gburil	laminar		22	6	2	20	235094	525943	2996621	82	2	Laminita
1073	2307	7p	lit	sil	g--207	bp	gburil	laminar		20	6	3	50	235572	526389	2996637	82	2	Laminita	173	237	-478	-446	478	446	654	227	47	-1	-16
1046	2211	7p	lit	sil	a--216	bn1g	s.def	s.def	b32a	34	16	11	530	235230	526437	2996644	83	1
2211	1046	7p	lit	sil	a--216	bp	gburil	laminar		24	10	4	110	234903	526285	2996627	83	1	Laminita	2211	146	327	152	327	152	361	65	65	3	17
2500	2401	7p	lit	sil	m--nc	bp	gburil	laminar		25	7	3	50	235804	527301	2996659	84	2	Laminita
2401	2500	7p	lit	sil	m--nc	bpf	cburil 1	ld		27	6	3	60	235412	526832	2996683	84	2		241	25	392	469	392	469	611	4	4	-2	-24
2265	1542	7p	lit	sil	sll--4	bn1g	s.def	s.def	b31	35	17	5	350	235240	526117	2996639	85	1
1542	2265	7p	lit	sil	sll--1	bpf	gburil	ld		14	4	2	100	235976	526707	2996579	85	1		1542	2265	-736	-59	736	59	943	231	51	4	6
1542	2406	7p	lit	sil	sll--1	bpf	gburil	ld		14	4	2	100	235976	526707	2996579	85	2
2406	1542	7p	lit	sil	sll--4	bp	gburil	laminar		28	5	4	50	235459	526850	2996674	85	2	Laminita	246	1542	517	-143	517	143	536	15	15	-1	-95
1215	2805	7p	lit	sil	sll--3	bn2g	s.def	bpf	b21	30	16	6	330	235230	526293	2996647	86	1	Lasca
2805	1215	7p	lit	sil	sll--1	bpf	gburil	ld		16	3	3	10	235183	526404	2996673	86	1		285	1215	47	-111	47	111	121	157	157	-12	-26
1781	2835	7p	lit	sil	sll--3	bn1g	s.def	s.def		43	17	4	280	234953	525747	2996711	87	1
2835	1781	7p	lit	sil	sll--3	bpf	cburil 2	ld		22	4	2	10	235391	526187	2996684	87	1		2835	1781	-438	-44	438	44	621	225	45	2	27
1781	1061	7p	lit	sil	sll--3	bn1g	s.def	s.def	b31	43	17	4	280	234953	525747	2996711	87	1
1061	1781	7p	lit	sil	sll--3	bp	gburil	laminar	b31	21	5	3	30	235170	526175	2996660	87	1	Laminita	161	1781	-217	-428	217	428	48	27	27	6	51
1061	2835	7p	lit	sil	sll--3	bp	gburil	laminar		21	5	3	30	235170	526175	2996660	87	2	Laminita
2835	1061	7p	lit	sil	sll--3	bpf	cburil 2	ld		22	4	2	10	235391	526187	2996684	87	2		2835	161	-221	-12	221	12	221	267	87	-6	-24
1367	1286	7p	lit	sil	sll--4	bn1g	s.def	s.def	b32	35	20	9	590	235080	526379	2996621	88	1
1286	1367	7p	lit	sil	sll--4	bp	gburil	laminar		23	5	3	40	235259	526285	2996616	88	1	Laminita	1286	1367	-179	94	179	94	22	298	118	1	5
2506	1286	7p	lit	sil	sll--4	bpf	gburil	lp		19	5	3	40	235659	527035	2996665	88	2
1286	2506	7p	lit	sil	sll--4	bp	gburil	laminar		23	5	3	40	235259	526285	2996616	88	2	Laminita	1286	256	4	75	4	75	85	28	28	3	49
1379	1921	7p	lit	sil	sll--3	bpf	gburil	lp		17	5	2	20	235591	526484	2996614	88	2
1921	1379	7p	lit	sil	sll--4	bp	cburil 2	bp(l)		32	5	4	50	235057	525540	2996716	88	2	Laminita	1921	1379	534	944	534	944	185	29	29	-5	-12
2506	1921	7p	lit	sil	sll--4	bpf	gburil	lp		19	5	3	40	235659	527035	2996665	88	2
1921	2506	7p	lit	sil	sll--4	bp	cburil 2	bp(l)		32	5	4	50	235057	525540	2996716	88	2	Laminita	1921	256	62	1495	62	1495	1612	22	22	-2	-51
1379	2374	7p	lit	sil	sll--3	bpf	gburil	lp		17	5	2	20	235591	526484	2996614	88	2
2374	1379	7p	lit	sil	sll--4	bp	cburil 1	bp(l)		28	4	2	30	235401	526742	2996708	88	2	Laminita	2374	1379	19	-258	19	258	32	144	144	-16	-94
1281	2091	7p	lit	sil	m--nc	bn1g	s.def	s.def	b22	40	17	11	790	235182	526319	2996616	89	1
2091	1281	7p	lit	sil	m--220	bp	tb	bp(l)		23	10	4	50	235112	525935	2996646	89	1	Laminita	291	1281	7	384	7	384	39	1	1	-4	-3
852	2332	7p	lit	sil	nc	bp	gburil	laminar		31	8	4	60	235496	526368	2996660	90	2	Laminita
2332	852	7p	lit	sil	sll--3	bpf	gburil	ld		25	4	3	20	235917	526536	2996584	90	2		2332	852	-421	-168	421	168	453	248	68	1	76
1232	2313	7p	lit	sil	a--201	bn1g	s.def	s.def	b23a	36	25	8	830	236015	526788	2996616	91	1
2313	1232	7p	lit	sil	a--201	bp	cburil 1	bp(l)		32	10	3	130	235006	525916	2996625	91	1	Laminita	2313	1232	19	872	19	872	1334	49	49	0	-9
815	697	7p	lit	sil	sll--4	bp	s.def	lasca		20	18	4	140	239504	528733	2996764	92	2	Lasca
697	815	7p	lit	sil	sll--4	bp	s.def	lasca		15	26	4	100	239348	528643	2996574	92	2	Lasca	697	815	156	9	156	9	18	6	6	47	19
2321	924	7p	lit	sil	m--2109	bp	s.def	lasca		26	18	3	60	235086	525664	2996639	94	2	Lasca
924	2321	7p	lit	sil	m--2109	bp	s.def	lasca		21	14	4	80	235092	526179	2996656	94	2	Lasca	924	2321	-6	-515	6	515	515	181	1	-2	-17
2042	1682	7p	lit	sil	m--2109	bn1g	s.def	s.def	b31	46	22	20	2040	234970	526070	2996648	96	1
1682	2042	7p	lit	sil	m--2109	bp	s.def	laminar		11	8	2	30	234615	525444	2996811	96	1	Lasca	1682	242	355	626	355	626	72	3	3	-13	-163
2776	2042	7p	lit	sil	m--2109	bpf	gburil	lp		33	15	5	320	235259	526504	2996691	96	1
2042	2776	7p	lit	sil	m--2109	bn1g	s.def	s.def	t1	46	22	20	2040	234970	526070	2996648	96	1		242	2776	289	434	289	434	521	34	34	5	43
1981	2042	7p	lit	sil	m--2109	bpf	cburil 2	ld		20	12	7	170	235186	525982	2996675	96	1
2042	1981	7p	lit	sil	m--2109	bn1g	s.def	s.def	b31	46	22	20	2040	234970	526070	2996648	96	1		242	1981	216	-88	216	88	233	112	112	7	27
2111	2776	7p	lit	sil	m--2109	bn2g	gburil	bp(l)	t1	36	14	6	270	235140	526105	2996639	96	2	Lasca laminar
2776	2111	7p	lit	sil	m--2109	bpf	gburil	lp		33	15	5	320	235259	526504	2996691	96	2		2776	2111	-119	-399	119	399	416	197	17	-7	-52
1064	1048	7p	lit	sil	m--2109	bpf	gburil	lp		27	7	6	60	235257	526223	2996662	96	2
1048	1064	7p	lit	sil	m--2109	bp	gburil	laminar		38	10	3	130	235271	526539	2996654	96	2	Laminita	148	164	-14	-316	14	316	316	183	3	1	8
1420	1048	7p	lit	sil	m--2109	bp	s.def	s.def		19	11	4	60	235092	526230	2996618	96	2	Lasca
1048	1420	7p	lit	sil	m--2109	bp	gburil	laminar		38	10	3	130	235271	526539	2996654	96	2	Laminita	148	142	-179	-39	179	39	357	21	3	-6	-36
2190	1048	7p	lit	sil	m--2109	bp	gburil	laminar		45	16	11	510	235179	526148	2996654	96	2	Lasca laminar
1048	2190	7p	lit	sil	m--2109	bp	gburil	laminar		38	10	3	130	235271	526539	2996654	96	2	Laminita	148	219	-92	-391	92	391	42	193	13	0	0
4156	1048	7p	lit	sil	s.def	bpf	cburil 2	lp		16	9	3	60	234089	527135	2996726	96	2
1048	4156	7p	lit	sil	m--2109	bp	gburil	laminar		38	10	3	130	235271	526539	2996654	96	2	Laminita	148	4156	-1182	596	1182	596	1324	297	117	3	72
2190	1064	7p	lit	sil	m--2109	bp	gburil	laminar		45	16	11	510	235179	526148	2996654	96	2	Lasca laminar
1064	2190	7p	lit	sil	m--2109	bpf	gburil	lp		27	7	6	60	235257	526223	2996662	96	2		164	219	-78	-75	78	75	18	226	46	-4	-8
3241	1420	7p	lit	sil	m--2109	bpf	cburil 1	ld		28	7	4	50	235386	526321	2996705	96	2
1420	3241	7p	lit	sil	m--2109	bp	s.def	s.def		19	11	4	60	235092	526230	2996618	96	2	Lasca	142	3241	294	91	294	91	38	73	73	16	87
4156	1420	7p	lit	sil	s.def	bpf	cburil 2	lp		16	9	3	60	234089	527135	2996726	96	2
1420	4156	7p	lit	sil	m--2109	bp	s.def	s.def		19	11	4	60	235092	526230	2996618	96	2	Lasca	142	4156	-13	95	13	95	1351	312	132	5	18
1420	1768	7p	lit	sil	m--2109	bp	s.def	s.def		19	11	4	60	235092	526230	2996618	96	2	Lasca
1768	1420	7p	lit	sil	m--2109	bp	cburil 2	bp(l)		47	13	7	500	235070	525610	2996718	96	2	Lasca laminar	1768	142	22	62	22	62	62	2	2	-9	-1
1981	1768	7p	lit	sil	m--2109	bpf	cburil 2	ld		20	12	7	170	235186	525982	2996675	96	1
1768	1981	7p	lit	sil	m--2109	bp	cburil 2	bp(l)		47	13	7	500	235070	525610	2996718	96	2	Lasca laminar	1768	1981	116	372	116	372	39	17	17	-6	-43
2029	1768	7p	lit	sil	m--2109	bpf	gburil	lp		17	9	4	70	235103	525795	2996673	96	2
1768	2029	7p	lit	sil	m--2109	bp	cburil 2	bp(l)		47	13	7	500	235070	525610	2996718	96	2	Lasca laminar	1768	229	33	185	33	185	188	1	1	-13	-45
2123	1768	7p	lit	sil	m--2109	bpf	gburil	ld		19	9	2	40	235042	526037	2996638	96	2
1768	2123	7p	lit	sil	m--2109	bp	cburil 2	bp(l)		47	13	7	500	235070	525610	2996718	96	2	Lasca laminar	1768	2123	-28	427	28	427	428	356	176	-11	-8
3241	1768	7p	lit	sil	m--2109	bpf	cburil 1	ld		28	7	4	50	235386	526321	2996705	96	2
1768	3241	7p	lit	sil	m--2109	bp	cburil 2	bp(l)		47	13	7	500	235070	525610	2996718	96	2	Lasca laminar	1768	3241	316	711	316	711	778	24	24	-1	-13
1048	1950	7p	lit	sil	m--2109	bp	gburil	laminar		38	10	3	130	235271	526539	2996654	96	2	Laminita
1950	1048	7p	lit	sil	m--2109	bp	s.def	lasca		12	16	4	60	235087	525759	2996683	96	2	Lasca	195	148	184	78	184	78	81	13	13	-2	-29
1420	1950	7p	lit	sil	m--2109	bp	s.def	s.def		19	11	4	60	235092	526230	2996618	96	2	Lasca
1950	1420	7p	lit	sil	m--2109	bp	s.def	lasca		12	16	4	60	235087	525759	2996683	96	2	Lasca	195	142	5	471	5	471	471	1	1	-8	-65
1420	2029	7p	lit	sil	m--2109	bp	s.def	s.def		19	11	4	60	235092	526230	2996618	96	2	Lasca
2029	1420	7p	lit	sil	m--2109	bpf	gburil	lp		17	9	4	70	235103	525795	2996673	96	2		229	142	-11	435	11	435	435	359	179	-7	-55
3241	2029	7p	lit	sil	m--2109	bpf	cburil 1	ld		28	7	4	50	235386	526321	2996705	96	2
2029	3241	7p	lit	sil	m--2109	bpf	gburil	lp		17	9	4	70	235103	525795	2996673	96	2		229	3241	283	526	283	526	597	28	28	3	32
4156	2029	7p	lit	sil	s.def	bpf	cburil 2	lp		16	9	3	60	234089	527135	2996726	96	2
2029	4156	7p	lit	sil	m--2109	bpf	gburil	lp		17	9	4	70	235103	525795	2996673	96	2		229	4156	-114	134	114	134	168	323	143	2	53
1768	2111	7p	lit	sil	m--2109	bp	cburil 2	bp(l)		47	13	7	500	235070	525610	2996718	96	2	Lasca laminar
2111	1768	7p	lit	sil	m--2109	bn2g	gburil	bp(l)	t1	36	14	6	270	235140	526105	2996639	96	2	Lasca laminar	2111	1768	-7	-495	7	495	5	188	8	9	79
1420	2123	7p	lit	sil	m--2109	bp	s.def	s.def		19	11	4	60	235092	526230	2996618	96	2	Lasca
2123	1420	7p	lit	sil	m--2109	bpf	gburil	ld		19	9	2	40	235042	526037	2996638	96	2		2123	142	5	193	5	193	199	15	15	-6	-2
3241	2123	7p	lit	sil	m--2109	bpf	cburil 1	ld		28	7	4	50	235386	526321	2996705	96	2
2123	3241	7p	lit	sil	m--2109	bpf	gburil	ld		19	9	2	40	235042	526037	2996638	96	2		2123	3241	344	284	344	284	446	5	5	9	67
1981	2776	7p	lit	sil	m--2109	bpf	cburil 2	ld		20	12	7	170	235186	525982	2996675	96	1
2776	1981	7p	lit	sil	m--2109	bpf	gburil	lp		33	15	5	320	235259	526504	2996691	96	4		2776	1981	-73	-522	73	522	527	188	8	-2	-16
2029	2123	7p	lit	sil	m--2109	bpf	gburil	lp		17	9	4	70	235103	525795	2996673	96	2
2123	2029	7p	lit	sil	m--2109	bpf	gburil	ld		19	9	2	40	235042	526037	2996638	96	4		2123	229	61	-242	61	242	25	166	166	8	35
3241	4156	7p	lit	sil	m--2109	bpf	cburil 1	ld		28	7	4	50	235386	526321	2996705	96	2
4156	3241	7p	lit	sil	s.def	bpf	cburil 2	lp		16	9	3	60	234089	527135	2996726	96	4		4156	3241	1297	-814	1297	814	1531	122	122	-1	-21
1100	1821	7p	lit	sil	m--220	bpf	s.def	lm		24	11	1	30	235030	526457	2996629	97	4
1821	1100	7p	lit	sil	m--220	bpf	s.def	lp		13	10	4	40	235243	525898	2996679	97	4		1821	11	-213	559	213	559	598	339	159	-5	-5
950	2171	7p	lit	sil	m--220	bpf	s.def	lm		33	22	6	430	235135	526267	2996644	98	4
2171	950	7p	lit	sil	m--220	bpf	s.def	lm		20	16	4	120	235207	526086	2996649	98	4		2171	95	-72	181	72	181	195	338	158	-1	-5
2783	1876	7p	lit	sil	m--220	bpf	s.def	lp		37	17	5	290	235195	526212	2996665	99	4
1876	2783	7p	lit	sil	m--220	bpf	s.def	ld		21	15	2	100	235195	525853	2996676	99	4		1876	2783	0	359	0	359	359	0	0	-2	-11
952	1113	7p	lit	sil	m--220	bpf	s.def	ld		21	10	2	30	235012	526349	2996647	100	2
1113	952	7p	lit	sil	m--220	bpf	s.def	ld		39	16	5	230	235398	526674	2996666	100	2		1113	952	-386	-325	386	325	55	23	5	-2	-19
2381	1113	7p	lit	sil	m--220	bn2g	s.def	bp	b11	61	33	7	1530	235328	526912	2996709	100	2	Lasca
1113	2381	7p	lit	sil	m--220	bpf	s.def	ld		39	16	5	230	235398	526674	2996666	100	2		1113	2381	-7	238	7	238	248	344	164	1	43
952	2381	7p	lit	sil	m--220	bpf	s.def	ld		21	10	2	30	235012	526349	2996647	100	2
2381	952	7p	lit	sil	m--220	bn2g	s.def	bp	b11	61	33	7	1530	235328	526912	2996709	100	2	Lasca	2381	952	-316	-563	316	563	646	29	29	-5	-62
2381	2460	7p	lit	sil	m--220	bn2g	s.def	bp	b11	61	33	7	1530	235328	526912	2996709	100	2	Lasca
2460	2381	7p	lit	sil	m--220	bpf	s.def	lm		26	11	3	90	235525	526713	2996650	100	2		246	2381	-197	199	197	199	28	315	135	12	59
1176	1183	7p	lit	sil	m--220	bpf	s.def	lp		12	6	2	10	235433	526254	2996634	101	4
1183	1176	7p	lit	sil	m--220	bpf	s.def	ld		12	6	1	10	235368	526405	2996638	101	4		1183	1176	65	-151	65	151	164	157	157	-1	-4
1022	875	7p	lit	sil	m--220	bpf	s.def	lm		29	17	4	180	235312	526326	2996644	102	4
875	1022	7p	lit	sil	m--220	bpf	s.def	lm		20	12	3	100	235276	526331	2996656	102	4		875	122	36	-5	36	5	36	98	98	-18	-12
1325	991	7p	lit	sil	g--nc	bp	gburil	laminar		30	10	2	60	235168	526244	2996626	103	2	Laminita
991	1325	7p	lit	sil	g--211	bpf	cburil 1	lp		21	6	4	60	235063	526305	2996643	103	2		991	1325	15	-61	15	61	121	12	12	-8	-17
1940	941	7p	lit	sil	nc	bpf	s.def	s.def		28	25	8	640	234739	526162	2996675	104	2
941	1940	7p	lit	sil	nc	bpf	s.def	lp		36	20	7	510	235238	526409	2996666	104	2		941	194	-499	-247	499	247	557	244	64	1	9
1940	2156	7p	lit	sil	nc	bpf	s.def	s.def		28	25	8	640	234739	526162	2996675	104	2
2156	1940	7p	lit	sil	a--201	bpf	s.def	s.def		15	14	3	70	235119	526116	2996633	104	2		2156	194	-38	46	38	46	383	277	97	6	42
2407	1277	7p	lit	sil	nc	bpf	s.def	ld		37	11	4	180	235610	526692	2996642	105	4
1277	2407	7p	lit	sil	a--201	bpf	s.def	lp		19	12	4	800	235350	526173	2996643	105	4		1277	247	26	519	26	519	58	27	27	0	-1
1009	2027	7p	lit	sil	sll--3	bpf	s.def	lm		36	15	3	170	235255	526561	2996656	106	4
2027	1009	7p	lit	sil	sll--3	bpf	s.def	lp		10	9	2	20	235173	525858	2996665	106	4		227	19	82	73	82	73	78	7	7	-1	-9
1105	973	7p	lit	sil	sll--4	bpf	s.def	lp		19	15	5	160	235322	526192	2996648	107	4
973	1105	7p	lit	sil	sll--3	bpf	s.def	ld		21	15	3	90	235533	526615	2996653	107	4		973	115	-211	-423	211	423	473	27	27	-1	-5
1893	1869	7p	lit	sil	sll--3	bpf	s.def	ld		18	9	2	30	234635	525466	2996748	108	4
1869	1893	7p	lit	sil	sll--4	bpf	s.def	lm		10	7	2	10	234597	526100	2996706	108	4		1869	1893	38	-634	38	634	635	177	177	4	42
1760	1884	7p	lit	sil	nc	bn1g	s.def	s.def		37	28	14	1420	234846	525697	2996717	109	1
1884	1760	7p	lit	sil	sll--4	bpf	s.def	s.def		16	14	6	40	235071	525551	2996737	109	1		1884	176	-225	146	225	146	268	33	123	-4	-2
1760	2071	7p	lit	sil	nc	bn1g	s.def	s.def		37	28	14	1420	234846	525697	2996717	109	1
2071	1760	7p	lit	sil	sll--4	bpf	gburil	ld	d1	20	10	5	50	235267	526024	2996675	109	1		271	176	-421	-327	421	327	533	232	52	5	42
1917	2071	7p	lit	sil	sll--4	bpf	cburil 1	lp		18	6	4	50	235080	525626	2996692	109	4
2071	1917	7p	lit	sil	sll--4	bpf	gburil	ld	d1	20	10	5	50	235267	526024	2996675	109	4		271	1917	-187	-398	187	398	44	25	25	2	17
960	1926	7p	lit	sil	g--nc	bn1g	s.def	s.def	b31a	34	23	10	980	235356	526146	2996664	110	1
1926	960	7p	lit	sil	g--211	bp	tb	bp(l)		26	11	3	90	234979	525704	2996692	110	1	Laminita	1926	96	377	442	377	442	581	4	4	-3	-28
960	4207	7p	lit	sil	g--nc	bn1g	s.def	s.def	b31a	34	23	10	980	235356	526146	2996664	110	1
4207	960	7p	lit	sil	s.def	bp	tb	bp(l)		10	4	2	10	234658	526179	2996747	110	1	Laminita	427	96	698	-33	698	33	699	93	93	-7	-83
1926	4207	7p	lit	sil	g--211	bp	tb	bp(l)		26	11	3	90	234979	525704	2996692	110	2	Laminita
4207	1926	7p	lit	sil	s.def	bp	tb	bp(l)		10	4	2	10	234658	526179	2996747	110	2	Laminita	427	1926	321	-475	321	475	573	146	146	-5	-55
1926	4318	7p	lit	sil	g--211	bp	tb	bp(l)		26	11	3	90	234979	525704	2996692	110	2	Laminita
4318	1926	7p	lit	sil	s.def	bp	tb	bp		18	10	2	60	234879	526109	2996676	110	2	Lasca	4318	1926	1	-45	1	45	417	166	166	2	16
1906	2151	7p	lit	sil	g--001	bp	s.def	laminar		23	8	3	40	234912	525497	2996730	111	2	Laminita
2151	1906	7p	lit	sil	g--211	bp	s.def	laminar		16	7	1	10	234985	525987	2996637	111	2	Laminita	2151	196	-73	-49	73	49	495	188	8	11	93
1077	1106	7p	lit	sil	m--nc	bp	cburil 2	bp(l)		44	9	8	160	235902	526565	2996626	112	2	Laminita
1106	1077	7p	lit	sil	m--nc	bp	gburil	laminar		23	9	4	50	235292	526230	2996644	112	2	Laminita	116	177	61	335	61	335	696	61	61	-1	-18
1077	4298	7p	lit	sil	m--nc	bp	cburil 2	bp(l)		44	9	8	160	235902	526565	2996626	112	2	Laminita
4298	1077	7p	lit	sil	s.def	bp	gburil	laminar		17	7	3	40	234804	525972	2996658	112	2	Laminita	4298	177	198	593	198	593	1248	62	62	-1	-32
1664	977	7p	lit	sil	sll--3	bp	s.def	laminar		39	10	4	170	234531	525849	2996772	113	2	Laminita
977	1664	7p	lit	sil	sll--3	bp	s.def	laminar		36	7	4	90	235651	526304	2996647	113	2	Laminita	977	1664	-112	-455	112	455	129	248	68	6	125
1698	1124	7p	lit	sil	sll--3	bpf	gburil	ld		28	8	3	50	234715	526019	2996709	114	2
1124	1698	7p	lit	sil	sll--3	bpf	gburil	ld		19	5	2	20	235634	526426	2996627	114	2		1124	1698	-919	-47	919	47	15	246	66	5	82
1698	2080	7p	lit	sil	sll--3	bpf	gburil	ld		28	8	3	50	234715	526019	2996709	114	2
2080	1698	7p	lit	sil	sll--3	bp	gburil	laminar		23	8	3	50	234987	525978	2996649	114	2	Laminita	28	1698	-272	41	272	41	275	279	99	12	6
1698	2236	7p	lit	sil	sll--3	bpf	gburil	ld		28	8	3	50	234715	526019	2996709	114	2
2236	1698	7p	lit	sil	sll--4	bp	gburil	laminar		37	8	5	150	235189	526066	2996639	114	2	Laminita	2236	1698	-474	-47	474	47	476	264	84	8	7
2080	2236	7p	lit	sil	sll--3	bp	gburil	laminar		23	8	3	50	234987	525978	2996649	114	2	Laminita
2236	2080	7p	lit	sil	sll--4	bp	gburil	laminar		37	8	5	150	235189	526066	2996639	114	2	Laminita	2236	28	-22	-88	22	88	22	246	66	3	1
1217	2531	7p	lit	sil	sll--4	bn1g	s.def	s.def	b31a	34	22	12	1620	235092	526261	2996645	115	1
2531	1217	7p	lit	sil	sll--3	bpf	s.def	lp		10	4	2	10	235649	527184	2996630	115	1		2531	1217	-557	-923	557	923	178	211	31	1	15
1854	2797	7p	lit	sil	g--208	bpf	s.def	s.def		18	12	4	80	235302	525893	2996678	116	2
2797	1854	7p	lit	sil	g--211	bpf	s.def	lp		31	9	4	130	235223	526577	2996675	116	2		2797	1854	79	-684	79	684	689	173	173	0	3
2797	2046	7p	lit	sil	g--211	bpf	s.def	lp		31	9	4	130	235223	526577	2996675	116	2
2046	2797	7p	lit	sil	g--208	bpf	cburil 1	ld		12	7	4	30	234797	526067	2996659	116	2		246	2797	426	51	426	51	665	4	4	1	16
1854	1468	7p	lit	sil	g--208	bpf	s.def	s.def		18	12	4	80	235302	525893	2996678	116	2
1468	1854	7p	lit	sil	g--208	bpf	s.def	s.def		17	16	2	90	235961	526590	2996588	116	4		1468	1854	-659	-697	659	697	959	223	43	5	9
1854	2046	7p	lit	sil	g--208	bpf	s.def	s.def		18	12	4	80	235302	525893	2996678	116	2
2046	1854	7p	lit	sil	g--208	bpf	cburil 1	ld		12	7	4	30	234797	526067	2996659	116	4		246	1854	55	-174	55	174	534	19	19	2	19
1919	1386	7p	lit	sil	m--220	bpf	s.def	ld		41	12	6	230	235010	525614	2996708	117	2
1386	1919	7p	lit	sil	m--220	bpf	s.def	ld		14	9	2	30	235699	526522	2996595	117	2		1386	1919	-689	-98	689	98	114	217	37	6	113
2110	2075	7p	lit	sil	m--220	bp	s.def	lasca		21	11	4	100	235175	526128	2996653	118	2	Lasca
2075	2110	7p	lit	sil	m--220	bpf	s.def	s.def		25	21	6	310	235075	525929	2996652	118	2		275	211	1	199	1	199	223	27	27	0	1
2075	2369	7p	lit	sil	m--220	bpf	s.def	s.def		25	21	6	310	235075	525929	2996652	118	2
2369	2075	7p	lit	sil	m--220	bpf	s.def	s.def		21	9	6	120	235362	526903	2996713	118	2		2369	275	-287	-974	287	974	115	196	16	-3	-61
2110	2369	7p	lit	sil	m--220	bp	s.def	lasca		21	11	4	100	235175	526128	2996653	118	2	Lasca
2369	2110	7p	lit	sil	m--220	bpf	s.def	s.def		21	9	6	120	235362	526903	2996713	118	2		2369	211	-187	-775	187	775	797	194	14	-4	-6
1034	2230	7p	lit	sil	m--220	bpf	s.def	s.def		17	17	3	90	235147	526586	2996645	119	1
2230	1034	7p	lit	sil	m--220	bn1g	s.def	s.def		31	26	16	1320	235109	525935	2996640	119	1		223	134	38	651	38	651	652	3	3	0	5
1034	855	7p	lit	sil	m--220	bpf	s.def	s.def		17	17	3	90	235147	526586	2996645	119	1
855	1034	7p	lit	sil	m--220	bpf	s.def	s.def		16	13	2	30	235300	526459	2996687	119	2		855	134	-153	127	153	127	199	31	13	-12	-42
1072	1453	7p	lit	sil	m--220	bpf	gburil	lp		18	5	2	30	235627	526323	2996645	120	2
1453	1072	7p	lit	sil	m--220	bp	cburil 1	bp(l)		20	7	4	60	235116	526228	2996601	120	2	Laminita	1453	172	511	95	511	95	52	79	79	5	44
1398	1242	7p	lit	sil	m--220	bpf	s.def	s.def		36	21	6	290	235271	526115	2996642	121	4
1242	1398	7p	lit	sil	m--220	bp	s.def	s.def		36	24	5	380	235146	526366	2996626	121	4	Lasca	1242	1398	125	-251	125	251	28	154	154	3	16
3240	1747	7p	lit	sil	m--220	bp	s.def	lasca		26	18	5	200	235620	526365	2996658	122	2	Lasca
1747	3240	7p	lit	sil	m--220	bp	s.def	s.def		23	15	2	80	234965	526094	2996699	122	2	Lasca	1747	324	655	271	655	271	79	68	68	-3	-41
2087	2108	7p	lit	sil	m--220	bpf	s.def	lm		20	12	3	50	235183	526109	2996652	123	4
2108	2087	7p	lit	sil	m--220	bpf	s.def	lp		21	15	5	120	235194	526085	2996652	123	4		218	287	-11	24	11	24	26	335	155	0	0
3261	2128	7p	lit	sil	m--220	bpf	s.def	s.def		30	18	3	150	235086	526516	2996674	124	4
2128	3261	7p	lit	sil	m--220	bpf	s.def	s.def		24	23	3	210	235065	525874	2996656	124	4		2128	3261	21	642	21	642	642	2	2	2	18
1894	2205	7p	lit	sil	m--220	bpf	s.def	s.def		31	21	6	350	235309	525896	2996679	125	4
2205	1894	7p	lit	sil	m--220	bpf	s.def	s.def		16	7	4	30	234855	525940	2996627	125	4		225	1894	454	-44	454	44	456	96	96	7	52
1170	853	7p	lit	sil	m--220	bpf	s.def	s.def		27	16	5	230	235283	526249	2996643	126	4
853	1170	7p	lit	sil	m--220	bpf	s.def	s.def		20	8	3	40	235331	526365	2996662	126	4		853	117	-48	-116	48	116	126	22	22	-9	-19
976	1170	7p	lit	sil	m--220	bpf	s.def	s.def		15	6	5	40	235625	526476	2996639	126	4
1170	976	7p	lit	sil	m--220	bpf	s.def	s.def		27	16	5	230	235283	526249	2996643	126	4		117	976	342	227	342	227	41	56	56	-1	-4
976	2240	7p	lit	sil	m--220	bpf	s.def	s.def		15	6	5	40	235625	526476	2996639	126	4
2240	976	7p	lit	sil	m--220	bpf	s.def	s.def		25	15	5	170	235169	525878	2996640	126	4		224	976	456	598	456	598	752	37	37	0	-1
1788	1372	7p	lit	sil	m--2109	bp	s.def	laminar		19	8	3	30	234671	525990	2996716	127	2	Laminita
1372	1788	7p	lit	sil	m--2109	bp	s.def	laminar		20	10	2	30	235112	526238	2996619	127	2	Laminita	1372	1788	-441	-248	441	248	56	241	61	11	97
1283	4498	7p	lit	sil	sll--4	bn2g	s.def	bpf	b22	25	26	10	700	235262	526390	2996618	128	1	Lasca
4498	1283	7p	lit	sil	s.def	bpf	gburil	ld		16	8	5	70	234819	525765	2996676	128	1		4498	1283	443	625	443	625	766	35	35	-4	-58
1283	4518	7p	lit	sil	sll--4	bn2g	s.def	bpf	b22	25	26	10	700	235262	526390	2996618	128	1	Lasca
4518	1283	7p	lit	sil	s.def	bp	gburil	lasca		7	7	2	20	234738	525672	2996677	128	1	Lasca	4518	1283	524	718	524	718	889	36	36	-4	-59
4498	1437	7p	lit	sil	s.def	bpf	gburil	ld		16	8	5	70	234819	525765	2996676	128	2
1437	4498	7p	lit	sil	sll--3	bp	gburil	laminar		15	6	2	30	235824	526622	2996590	128	2	Laminita	1437	4498	-15	-857	15	857	1321	23	5	4	86
4518	1437	7p	lit	sil	s.def	bp	gburil	lasca		7	7	2	20	234738	525672	2996677	128	2	Lasca
1437	4518	7p	lit	sil	sll--3	bp	gburil	laminar		15	6	2	30	235824	526622	2996590	128	2	Laminita	1437	4518	-186	-95	186	95	1443	229	49	3	87
4518	4498	7p	lit	sil	s.def	bp	gburil	lasca		7	7	2	20	234738	525672	2996677	128	2	Lasca
4498	4518	7p	lit	sil	s.def	bpf	gburil	ld		16	8	5	70	234819	525765	2996676	128	2		4498	4518	-81	-93	81	93	123	221	41	0	1
2255	4329	7p	lit	sil	a--201	bpf	gburil	ld		19	8	6	100	235095	525950	2996635	129	2
4329	2255	7p	lit	sil	s.def	bpf	gburil	ld		16	5	4	40	234685	525860	2996675	129	2		4329	2255	41	9	41	9	42	78	78	-5	-4
1006	1018	7p	lit	sil	sll--4	bp	gburil	laminar		23	9	4	80	235064	526529	2996653	130	2	Laminita
1018	1006	7p	lit	sil	sll--4	bpf	cburil 1	ld		24	11	5	80	235394	526148	2996658	130	2		118	16	-33	381	33	381	54	319	139	-1	-5
2225	4374	7p	lit	sil	sll--4	bn2g	s.def	bp	b11	27	25	7	550	234988	525909	2996635	131	1	Lasca
4374	2225	7p	lit	sil	s.def	bp	gburil	laminar		15	3	2	20	235064	526393	2996623	131	1	Laminita	4374	2225	-76	-484	76	484	49	189	9	1	12
1872	4504	7p	lit	sil	sll--4	bp	gburil	laminar		24	7	5	50	235124	525973	2996667	132	2	Laminita
4504	1872	7p	lit	sil	s.def	bp	cburil 1	bp(l)		19	5	3	30	234780	526008	2996677	132	2	Laminita	454	1872	344	-35	344	35	346	96	96	-2	-1
1127	1973	7p	lit	sil	sll--4	bp	cburil 1	bp(l)		30	11	6	150	235671	526513	2996615	133	2	Laminita
1973	1127	7p	lit	sil	sll--4	bp	cburil 1	bp(l)		27	7	6	120	234874	525715	2996694	133	2	Laminita	1973	1127	797	798	797	798	1128	45	45	-4	-79
4506	913	7p	lit	sil	s.def	bpf	gburil	lp		14	5	2	20	234681	526041	2996675	134	2
913	4506	7p	lit	sil	sll--1	bpf	gburil	ld		22	6	2	40	235334	526604	2996689	134	2		913	456	-653	-563	653	563	862	229	49	-1	-14
1934	2334	7p	lit	sil	sll--4	bp	gburil	laminar		27	8	4	50	235059	525867	2996679	135	2	Laminita
2334	1934	7p	lit	sil	sll--4	bp	gburil	laminar		23	8	3	40	235008	525878	2996617	135	2	Laminita	2334	1934	51	-11	51	11	52	12	12	5	62
2114	1075	7p	lit	sil	a--201	bn1g	s.def	s.def	r2	43	15	13	870	235021	525954	2996639	136	1
1075	2114	7p	lit	sil	a--201	bp	gburil	laminar		16	5	1	10	235390	526582	2996657	136	1	Laminita	175	2114	-369	-628	369	628	728	21	3	-1	-18
2113	1390	7p	lit	sil	a--201	bp	gburil	laminar		27	6	5	40	235087	526145	2996640	137	2	Laminita
1390	2113	7p	lit	sil	a--201	bpf	cburil 1	ld		24	5	4	30	235021	526362	2996621	137	2		139	2113	66	-217	66	217	227	163	163	5	19
2808	1354	7p	lit	sil	a--201	bp	gburil	laminar		28	5	2	40	235536	526277	2996665	138	2	Laminita
1354	2808	7p	lit	sil	a--201	bpf	gburil	lp		20	5	6	40	235368	526489	2996619	138	2		1354	288	168	-212	168	212	27	142	142	1	46
1833	1688	7p	lit	sil	sll--3	bn2g	gburil	ld	t1	36	5	4	60	235047	525689	2996687	139	2	Flaminita
1688	1833	7p	lit	sil	sll--3	bp	gburil	laminar		23	6	2	20	234773	526043	2996712	139	2	Laminita	1688	1833	274	-354	274	354	448	142	142	-3	-25
2122	1688	7p	lit	sil	sll--3	bp	gburil	laminar		27	5	3	50	235063	526000	2996632	139	2	Laminita
1688	2122	7p	lit	sil	sll--3	bp	gburil	laminar		23	6	2	20	234773	526043	2996712	139	2	Laminita	1688	2122	29	-43	29	43	293	98	98	-15	-8
2122	1833	7p	lit	sil	sll--3	bp	gburil	laminar		27	5	3	50	235063	526000	2996632	139	2	Laminita
1833	2122	7p	lit	sil	sll--3	bn2g	gburil	ld	t1	36	5	4	60	235047	525689	2996687	139	2		1833	2122	16	311	16	311	311	3	3	-1	-55
2232	1104	7p	lit	sil	sll--3	bn2g	s.def	bp	b31a	38	15	6	360	235178	526251	2996622	140	1	Lasca laminar
1104	2232	7p	lit	sil	sll--4	bpf	gburil	lp		16	3	2	10	235301	526131	2996650	140	1		114	2232	-123	12	123	12	172	314	134	-9	-28
2232	4287	7p	lit	sil	sll--3	bn2g	s.def	bp	b31a	38	15	6	360	235178	526251	2996622	140	1	Lasca laminar
4287	2232	7p	lit	sil	s.def	bpf	gburil	ld		10	2	1	10	235254	525785	2996658	140	1		4287	2232	-76	466	76	466	472	351	171	-4	-36
1173	1473	7p	lit	sil	g--206	bn1g	s.def	s.def	b32	32	26	9	780	235276	526157	2996653	141	1
1473	1173	7p	lit	sil	g--207	bp	gburil	laminar		20	5	4	40	235677	526371	2996615	141	1	Laminita	1473	1173	-41	-214	41	214	455	242	62	5	38
